# Supplementary material for: Vascular dysfunction in Alzheimer’s disease: a biomarker of disease progression and a potential therapeutic target
Source: PubMed Central journal article supplement — Neural Regen Res. 2019 Dec 10;15(6):1030–2. doi: 10.4103/1673-5374.270306 (PMC7034279; doi:10.4103/1673-5374.270306), 2019-12-10
Supplement: NRR-15-1030_Suppl1.pdf [file NRR-15-1030_Suppl1.pdf]

## OPEN PEER REVIEW REPORT 1

**Name of journal:** Neural Regeneration Research

**Manuscript NO:** NRR-D-19-00421

**Title:** Vascular Dysfunction in Alzheimer's Disease – a Biomarker of Disease Progression and a Potential Therapeutic Target

**Reviewer's Name:** Hans-Gert Bernstein

**Reviewer's country:** Germany

**Date sent for review:** 2019-08-01

### COMMENTS TO AUTHORS

This is a nicely written short overview about the putative implication of brain vasculature for the development and/ further progression of Alzheimer's disease.

Two minor points:

1. The authors write " Vascular cells also contribute directly to A $\beta$  catabolism, with A $\beta$ -degrading enzymes like neprilysin being expressed by the endothelium." I strongly suggest to also mention another important A $\beta$ -degrading Enzyme in this context, namely insulin degrading enzyme.
2. What about vascular ATP-binding cassette transporters? There is compelling evidence that at least one of them, ABCB1, is prominently involved in AD pathology.
